# Supplementary material for: Self-assembly of a nonanuclear NiII cluster via atmospheric CO2 fixation: synthesis, structure, collision-induced dissociation mass spectrometry and magnetic property
Source: Royal Society of Chemistry journal article supplement (doi:10.1039/d0dt01573c), 2020-01-01
Supplement: d0dt01573c1.pdf [file d0dt01573c1.pdf]

## Supplementary Information

### **Self-assembly of a nonanuclear Ni<sup>II</sup> cluster *via* atmospheric CO<sub>2</sub> fixation: synthesis, structure, collision-induced dissociation mass spectrometry and magnetic property**

Xue-Fei Tian,<sup>a</sup> Bao-Qian Ji,<sup>a</sup> Lei Feng,<sup>a</sup> Kai Sheng,<sup>b,\*</sup> Yan-Min Su,<sup>a</sup> Marko Jagodič,<sup>\*,c</sup>  
Zvonko Jagličić,<sup>c</sup> Chen-Ho Tung,<sup>a</sup> and Di Sun<sup>\*,a</sup>

<sup>a</sup>*School of Chemistry and Chemical Engineering, and State Key Laboratory of Crystal Materials, Shandong University, Jinan, 250100, People's Republic of China.*

*E-mail: dsun@sdu.edu.cn. Fax: +86-531-88364218.*

<sup>b</sup>*School of Aeronautics, Shandong Jiaotong University, Jinan, 250037, People's Republic of China. E-mail: shengkai@sdjtu.edu.cn.*

<sup>c</sup>*Institute of Mathematics, Physics and Mechanics, Jadranska 19, 1000 Ljubljana, Slovenia. E-mail: marko.jagodic@imfm.si*

## Experimental details

All reagents were used as received from commercial suppliers without further purification. C, H, and N analyses were performed on an EA1110 CHNS-0 CE 65 elemental analyzer. IR spectra were recorded on a PerkinElmer Spectrum Two in the frequency range of 500-4000  $\text{cm}^{-1}$ . Thermogravimetric analysis (TGA) was performed with a TA SDT Q600 thermal analyzer at a scanning rate of 20  $^{\circ}\text{C}/\text{min}$  under  $\text{N}_2$ , from 20 to 800  $^{\circ}\text{C}$ . The variable-temperature magnetic susceptibilities were measured using a Magnetic Property Measurement System (MPMS) and a SQUID-VSM (superconducting quantum interference device-vibrating sample magnetometer) (Quantum Design, USA). UV-Vis diffuse reflectance spectra (DRS) were recorded on a Thermo Scientific Evolution 220 UV-visible spectrophotometer equipped with a 60 mm integrating sphere and SPECTRALON<sup>®</sup> was used as the reference. High-resolution mass spectra (HR-MS) were recorded on a Bruker impact II high definition mass spectrometer, quadrupole and time-of-flight (Q/TOF) modules in the positive ion mode. Typical measurement conditions are as follows: end plate offset = 500 V; dry gas = 4 L/min, nebulizer = 0.3 bar, capillary voltage = 4500 V, sample flow rate = 4  $\mu\text{L}/\text{min}$ . Collision-induced dissociation (CID) mass spectrometry studies were performed by selecting one parent ion using a quadrupole mass filter and then colliding the ions with  $\text{N}_2$  in the trap chamber. Samples were analyzed at four different collision voltage: 5, 10, 15 and 20 eV. The data analyses of mass spectra were performed based on the isotope distribution patterns using Compass Data Analysis software (Version 4.4). The reported  $m/z$  values represent the monoisotopic mass of the most abundant peak within the isotope pattern. Photocurrent measurements were carried out using the CHI-660E electrochemical workstation in a three-electrode system. Generally: the samples (5 mg) of **SD/Ni9a** and naphthol (0.5 wt. %, 10  $\mu\text{L}$ ) were dispersed in 0.5 mL ethanol, and the mixture was sonicated for about 30 min. Then a 100  $\mu\text{L}$  solution was transferred by pipet dropped on the cleaned ITO glass and the coated film was obtained after evaporation under ambient atmosphere. The prepared ITO glass film was used as working electrode, a Pt wire as the counter electrode, and an Ag/AgCl electrode as the reference electrode. A  $\text{Na}_2\text{SO}_4$  aqueous solution (0.2 M) was used as the medium. A 50 W LED lamp was used as the light source with 420 nm fixed wavelength.

### Synthesis of **SD/Ni9a**

Ni(NO<sub>3</sub>)<sub>2</sub>·6H<sub>2</sub>O (58 mg, 0.2 mmol), 3,5-dimethylpyrazole (20 mg, 0.2 mmol) and benzoic acid (12 mg, 0.1 mmol) were dissolved in 6 mL EtOH/DMF (v/v = 4/2), then 50 μL Et<sub>3</sub>N (0.36 mmol) was added to above mixture. After stirring for 2h, a clear green solution with few precipitates was obtained. Thereafter, the solution was filtered and the filtrate was allowed to evaporate at room temperature undisturbed. Green block crystals of **SD/Ni9a** were obtained for about one week with the yield of about 55% (based on Ni). Calcd (found) for C<sub>102</sub>H<sub>128</sub>N<sub>16</sub>Ni<sub>9</sub>O<sub>33</sub> (**SD/Ni9a**), calcd (found): C, 46.50 (46.46); H, 4.89 (4.92); N, 8.51 (8.48) %; IR: 3670 (w), 3230 (w), 2982 (m), 1606 (s), 1566 (s), 1393 (vs), 1033 (s), 810 (m), 723 (s), 670 (s) cm<sup>-1</sup>.

## X-ray Crystallography

Single crystal of **SD/Ni9a** with appropriate dimensions was chosen under an optical microscope and quickly coated with high vacuum grease (Dow Corning Corporation) to prevent decomposition. Crystal was mounted on CryoLoop™ loop and the cell parameters and intensity data were recorded on a Rigaku Oxford Diffraction XtaLAB Synergy-S diffractometer equipped with a HyPix-6000HE Hybrid Photon Counting (HPC) detector operating in shutterless mode and an Oxford Cryosystems Cryostream 800 Plus at 173 K using CuK $\alpha$  ( $\lambda = 1.54184\text{\AA}$ ) PhotonJet micro-focus X-ray Source. Data were processed using the *CrystAlis*<sup>Pro</sup> software suite.<sup>1</sup> The structure was solved using the charge-flipping algorithm, as implemented in the program *SUPERFLIP*<sup>2</sup> and refined by full-matrix least-squares techniques against  $F_o^2$  using the SHELXL program<sup>3</sup> through the OLEX2 interface.<sup>4</sup> Hydrogen atoms at carbon were placed in calculated positions and refined isotropically by using a riding model. Appropriate restraints or constraints were applied to the geometry and the atomic displacement parameters of the atoms in the cluster. The structure was examined using the Addsym subroutine of PLATON<sup>5</sup> to ensure that no additional symmetry could be applied to the models. Pertinent crystallographic data collection and refinement parameters are collated in Table S1 Selected bond lengths and angles are collated in Table S2.

**Table S1** Crystal Data of **SD/Ni9a**.

| Compound                                       | SD/Ni9a                                                                                     |
|------------------------------------------------|---------------------------------------------------------------------------------------------|
| Formula                                        | C <sub>102</sub> H <sub>128</sub> N <sub>16</sub> Ni <sub>9</sub> O <sub>33</sub>           |
| Formula weight                                 | 2634.59                                                                                     |
| Temperature/K                                  | 173.00(10)                                                                                  |
| Crystal system                                 | Triclinic                                                                                   |
| Space group                                    | <i>P</i> -1                                                                                 |
| <i>a</i> /Å                                    | 14.8190(3)                                                                                  |
| <i>b</i> /Å                                    | 15.4014(3)                                                                                  |
| <i>c</i> /Å                                    | 28.1536(3)                                                                                  |
| $\alpha$ /°                                    | 103.9220(10)                                                                                |
| $\beta$ /°                                     | 90.0550(10)                                                                                 |
| $\gamma$ /°                                    | 112.649(2)                                                                                  |
| Volume/Å <sup>3</sup>                          | 5724.34(19)                                                                                 |
| <i>Z</i>                                       | 2                                                                                           |
| $\rho_{calc}$ , g/cm <sup>3</sup>              | 1.529                                                                                       |
| $\mu$ /mm <sup>-1</sup>                        | 2.267                                                                                       |
| <i>F</i> (000)                                 | 2736.0                                                                                      |
| Radiation                                      | CuK $\alpha$ ( $\lambda$ = 1.54184)                                                         |
| 2 $\theta$ range for data collection/°         | 6.414 to 134.146                                                                            |
| Index ranges                                   | -17 $\leq$ <i>h</i> $\leq$ 17, -18 $\leq$ <i>k</i> $\leq$ 18, -33 $\leq$ <i>l</i> $\leq$ 32 |
| Reflections collected                          | 56053                                                                                       |
| Independent reflections                        | 20035 $R_{int}$ = 0.0490, $R_{sigma}$ = 0.0511                                              |
| Data/restraints/parameters                     | 20035/3/1477                                                                                |
| Goodness-of-fit on $F^2$                       | 1.057                                                                                       |
| Final <i>R</i> indexes [ $I \geq 2\sigma(I)$ ] | $R_1$ = 0.0520, $wR_2$ = 0.1365                                                             |
| Final <i>R</i> indexes [all data]              | $R_1$ = 0.0691, $wR_2$ = 0.1535                                                             |
| Largest diff. peak, hole / e Å <sup>-3</sup>   | 1.04, -0.73                                                                                 |

**Table S2** The selected bond lengths [Å] and angles [°] for **SD/Ni9a**.

|             |             |             |             |
|-------------|-------------|-------------|-------------|
| Ni—O1       | 2.191 (2)   | Ni5—O9      | 2.282 (2)   |
| Ni—O6       | 1.986 (2)   | Ni5—O19     | 2.065 (2)   |
| Ni—O9       | 2.154 (2)   | Ni5—O22     | 2.022 (3)   |
| Ni—O11      | 1.998 (2)   | Ni5—N2      | 2.074 (3)   |
| Ni—O15      | 2.047 (3)   | Ni6—O2      | 2.145 (2)   |
| Ni—O20      | 2.039 (3)   | Ni6—O3      | 1.986 (2)   |
| Ni2—Ni9     | 2.9946 (8)  | Ni6—O7      | 2.174 (2)   |
| Ni2—O2      | 2.266 (2)   | Ni6—O14     | 1.989 (3)   |
| Ni2—O3      | 2.039 (2)   | Ni6—O17     | 2.054 (3)   |
| Ni2—O12     | 2.065 (3)   | Ni6—O21     | 2.029 (3)   |
| Ni2—O13     | 2.008 (3)   | Ni7—O1      | 2.148 (2)   |
| Ni2—O16     | 2.039 (3)   | Ni7—O11     | 2.058 (3)   |
| Ni2—N5      | 2.066 (3)   | Ni7—O14     | 2.021 (3)   |
| Ni3—Ni5     | 2.9813 (8)  | Ni7—O27     | 2.035 (3)   |
| Ni3—O4      | 2.226 (2)   | Ni7—O29     | 2.102 (3)   |
| Ni3—O6      | 2.042 (2)   | Ni7—N7      | 2.064 (3)   |
| Ni3—O8      | 2.038 (3)   | Ni8—O7      | 2.160 (3)   |
| Ni3—O10     | 2.047 (2)   | Ni8—O11     | 2.031 (3)   |
| Ni3—O25     | 2.054 (3)   | Ni8—O14     | 2.062 (3)   |
| Ni3—N1      | 2.055 (3)   | Ni8—O26     | 2.043 (3)   |
| Ni4—O4      | 2.172 (2)   | Ni8—O30     | 2.108 (3)   |
| Ni4—O5      | 2.171 (2)   | Ni8—N8      | 2.076 (3)   |
| Ni4—O8      | 1.980 (2)   | Ni9—O3      | 2.025 (2)   |
| Ni4—O13     | 1.970 (3)   | Ni9—O5      | 2.226 (3)   |
| Ni4—O24     | 2.033 (3)   | Ni9—O13     | 2.034 (3)   |
| Ni4—O28     | 2.030 (3)   | Ni9—O18     | 2.059 (3)   |
| Ni5—O6      | 2.037 (2)   | Ni9—O23     | 2.034 (3)   |
| Ni5—O8      | 2.018 (3)   | Ni9—N4      | 2.064 (3)   |
| O6—Ni1—O1   | 92.91 (9)   | O19—Ni5—O9  | 170.18 (10) |
| O6—Ni1—O9   | 81.85 (9)   | O19—Ni5—N2  | 96.39 (12)  |
| O6—Ni1—O11  | 173.59 (10) | O22—Ni5—O6  | 95.12 (11)  |
| O6—Ni1—O15  | 89.49 (10)  | O22—Ni5—O9  | 90.78 (10)  |
| O6—Ni1—O20  | 96.85 (10)  | O22—Ni5—O19 | 90.90 (11)  |
| O9—Ni1—O1   | 89.32 (9)   | O22—Ni5—N2  | 88.39 (13)  |
| O11—Ni1—O1  | 81.00 (9)   | N2—Ni5—Ni3  | 135.25 (10) |
| O11—Ni1—O9  | 96.00 (10)  | N2—Ni5—O9   | 93.32 (11)  |
| O11—Ni1—O15 | 92.96 (11)  | O2—Ni6—O7   | 90.61 (9)   |
| O11—Ni1—O20 | 89.21 (10)  | O3—Ni6—O2   | 81.86 (9)   |
| O15—Ni1—O1  | 94.49 (10)  | O3—Ni6—O7   | 94.93 (10)  |
| O15—Ni1—O9  | 170.72 (10) | O3—Ni6—O14  | 175.41 (11) |
| O20—Ni1—O1  | 170.16 (10) | O3—Ni6—O17  | 91.54 (10)  |

|             |             |             |             |
|-------------|-------------|-------------|-------------|
| O20—Ni1—O9  | 90.78 (10)  | O3—Ni6—O21  | 88.44 (11)  |
| O20—Ni1—O15 | 86.91 (11)  | O14—Ni6—O2  | 96.47 (10)  |
| O3—Ni2—O2   | 77.82 (9)   | O14—Ni6—O7  | 80.78 (11)  |
| O3—Ni2—O12  | 91.55 (10)  | O14—Ni6—O17 | 92.83 (11)  |
| O3—Ni2—O16  | 94.62 (10)  | O14—Ni6—O21 | 93.46 (12)  |
| O12—Ni2—O2  | 169.33 (10) | O17—Ni6—O2  | 93.31 (10)  |
| O12—Ni2—N5  | 96.59 (11)  | O17—Ni6—O7  | 172.86 (10) |
| O13—Ni2—O2  | 89.80 (10)  | O21—Ni6—O2  | 169.70 (11) |
| O13—Ni2—O3  | 82.95 (10)  | O21—Ni6—O7  | 93.68 (10)  |
| O13—Ni2—O12 | 87.96 (11)  | O21—Ni6—O17 | 83.46 (11)  |
| O13—Ni2—O16 | 176.67 (11) | O11—Ni7—O1  | 80.70 (9)   |
| O13—Ni2—N5  | 93.95 (11)  | O11—Ni7—O29 | 93.08 (12)  |
| O16—Ni2—Ni9 | 134.52 (8)  | O11—Ni7—N7  | 174.89 (12) |
| O16—Ni2—O2  | 91.91 (10)  | O14—Ni7—O1  | 93.97 (10)  |
| O16—Ni2—O12 | 89.84 (11)  | O14—Ni7—O11 | 80.78 (11)  |
| O16—Ni2—N5  | 88.78 (11)  | O14—Ni7—O27 | 173.72 (12) |
| N5—Ni2—O2   | 93.98 (10)  | O14—Ni7—O29 | 88.55 (12)  |
| O6—Ni3—O4   | 90.98 (9)   | O14—Ni7—N7  | 96.50 (12)  |
| O6—Ni3—O10  | 88.59 (10)  | O27—Ni7—O1  | 89.56 (10)  |
| O6—Ni3—O25  | 173.84 (11) | O27—Ni7—O11 | 94.69 (11)  |
| O6—Ni3—N1   | 94.24 (11)  | O27—Ni7—O29 | 87.35 (12)  |
| O8—Ni3—O4   | 78.72 (9)   | O27—Ni7—N7  | 88.34 (12)  |
| O8—Ni3—O6   | 83.22 (10)  | O29—Ni7—O1  | 172.81 (12) |
| O8—Ni3—O10  | 91.22 (10)  | N7—Ni7—O1   | 95.24 (11)  |
| O8—Ni3—O25  | 92.34 (11)  | N7—Ni7—O29  | 91.16 (13)  |
| O8—Ni3—N1   | 172.36 (11) | O11—Ni8—O7  | 92.94 (10)  |
| O10—Ni3—O4  | 169.91 (10) | O11—Ni8—O14 | 80.44 (11)  |
| O10—Ni3—O25 | 87.23 (11)  | O11—Ni8—O26 | 171.59 (11) |
| O10—Ni3—N1  | 95.93 (11)  | O11—Ni8—O30 | 90.02 (12)  |
| O25—Ni3—O4  | 92.34 (10)  | O11—Ni8—N8  | 97.76 (12)  |
| O25—Ni3—N1  | 90.69 (12)  | O14—Ni8—O7  | 79.53 (10)  |
| N1—Ni3—O4   | 94.16 (10)  | O14—Ni8—O30 | 96.69 (13)  |
| O5—Ni4—O4   | 91.86 (9)   | O14—Ni8—N8  | 172.85 (13) |
| O8—Ni4—O4   | 81.27 (10)  | O26—Ni8—O7  | 91.28 (11)  |
| O8—Ni4—O5   | 95.69 (10)  | O26—Ni8—O14 | 93.20 (11)  |
| O8—Ni4—O24  | 89.81 (11)  | O26—Ni8—O30 | 85.24 (13)  |
| O8—Ni4—O28  | 93.87 (11)  | O26—Ni8—N8  | 89.22 (13)  |
| O13—Ni4—O4  | 95.34 (10)  | O30—Ni8—O7  | 174.73 (11) |
| O13—Ni4—O5  | 81.48 (10)  | N8—Ni8—O7   | 93.70 (12)  |
| O13—Ni4—O8  | 175.55 (11) | N8—Ni8—O30  | 90.21 (14)  |
| O13—Ni4—O24 | 93.73 (11)  | O3—Ni9—O5   | 91.71 (9)   |
| O13—Ni4—O28 | 89.11 (11)  | O3—Ni9—O13  | 82.64 (10)  |
| O24—Ni4—O4  | 170.50 (10) | O3—Ni9—O18  | 87.90 (10)  |

|             |             |             |             |
|-------------|-------------|-------------|-------------|
| O24—Ni4—O5  | 92.28 (11)  | O3—Ni9—O23  | 176.49 (12) |
| O28—Ni4—O4  | 91.83 (11)  | O3—Ni9—N4   | 93.82 (11)  |
| O28—Ni4—O5  | 170.17 (10) | O13—Ni9—O5  | 78.78 (10)  |
| O28—Ni4—O24 | 85.48 (13)  | O13—Ni9—O18 | 90.99 (11)  |
| O6—Ni5—O9   | 77.70 (9)   | O13—Ni9—O23 | 94.74 (11)  |
| O6—Ni5—O19  | 92.51 (10)  | O13—Ni9—N4  | 172.50 (13) |
| O6—Ni5—N2   | 170.38 (11) | O18—Ni9—O5  | 169.73 (10) |
| O8—Ni5—O6   | 83.84 (10)  | O18—Ni9—N4  | 95.49 (13)  |
| O8—Ni5—O9   | 89.42 (9)   | O23—Ni9—O5  | 90.07 (11)  |
| O8—Ni5—O19  | 88.72 (10)  | O23—Ni9—O18 | 89.81 (12)  |
| O8—Ni5—O22  | 178.88 (11) | O23—Ni9—N4  | 89.05 (12)  |
| O8—Ni5—N2   | 92.70 (12)  | N4—Ni9—O5   | 94.78 (12)  |



Figure S1 IR spectrum of SD/Ni9a.

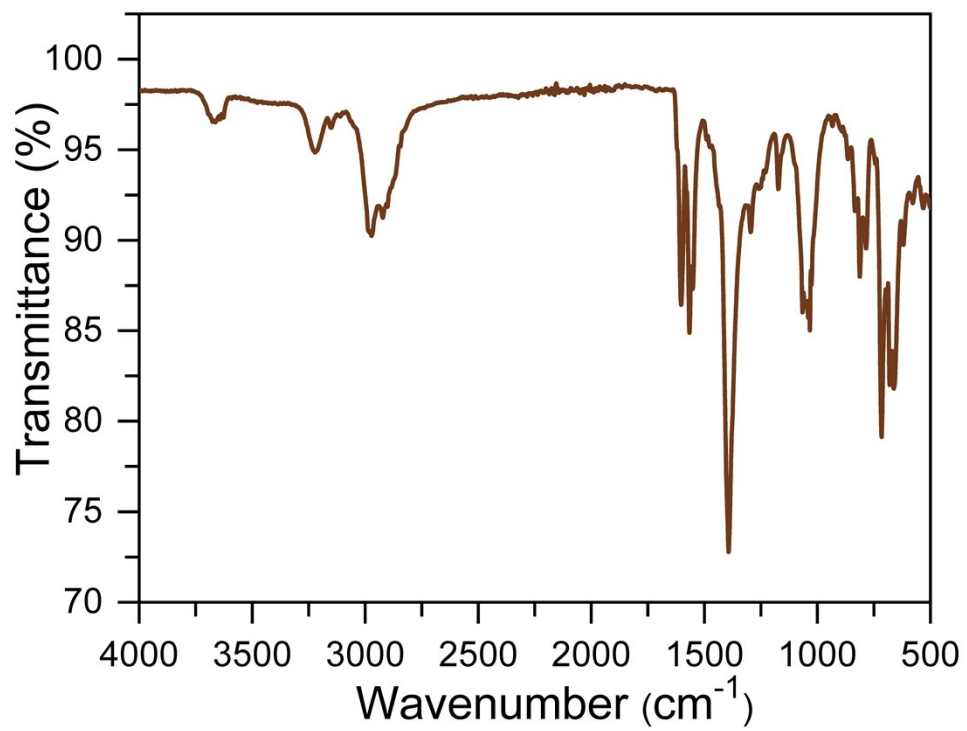

**Figure S2** The TGA of SD/Ni9a.

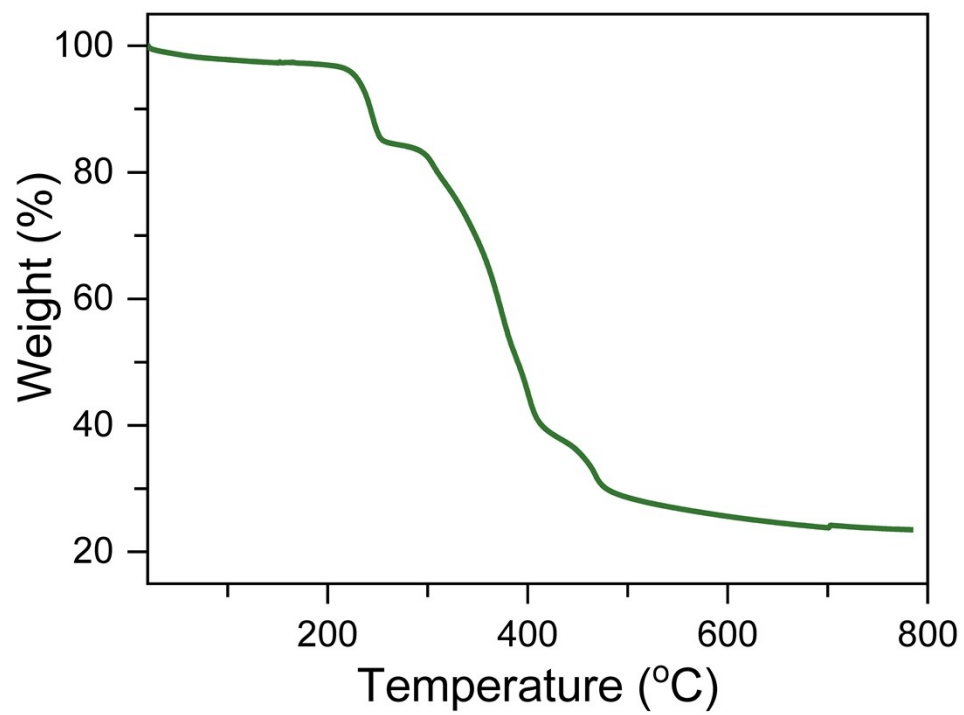

**Figure S3** (a) Three layered arrangement of the nine Ni atoms in the structure: Ni2-Ni3-Ni7-(CO<sub>3</sub>), Ni1-Ni4-Ni6, and Ni5-Ni8-Ni9-(CO<sub>3</sub>) planes. (b) The carbonates are separated by 2.87 Å. Ni: green, O: red, C: grey.

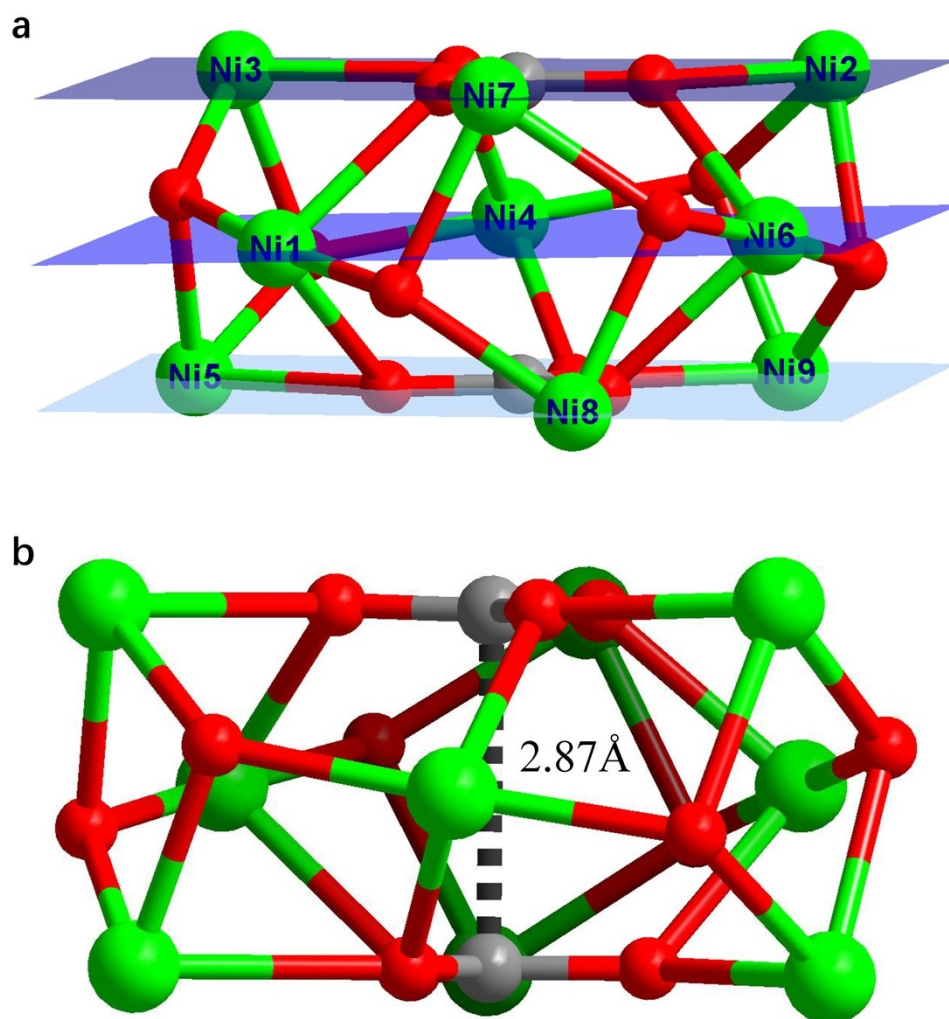

**Figure S4** The coordination mode of carbonate anion within the cluster ([6.2<sub>17</sub>2<sub>26</sub>2<sub>34</sub>] and [6.2<sub>15</sub>2<sub>49</sub>2<sub>68</sub>]). Ni: green, O: red, C: grey.

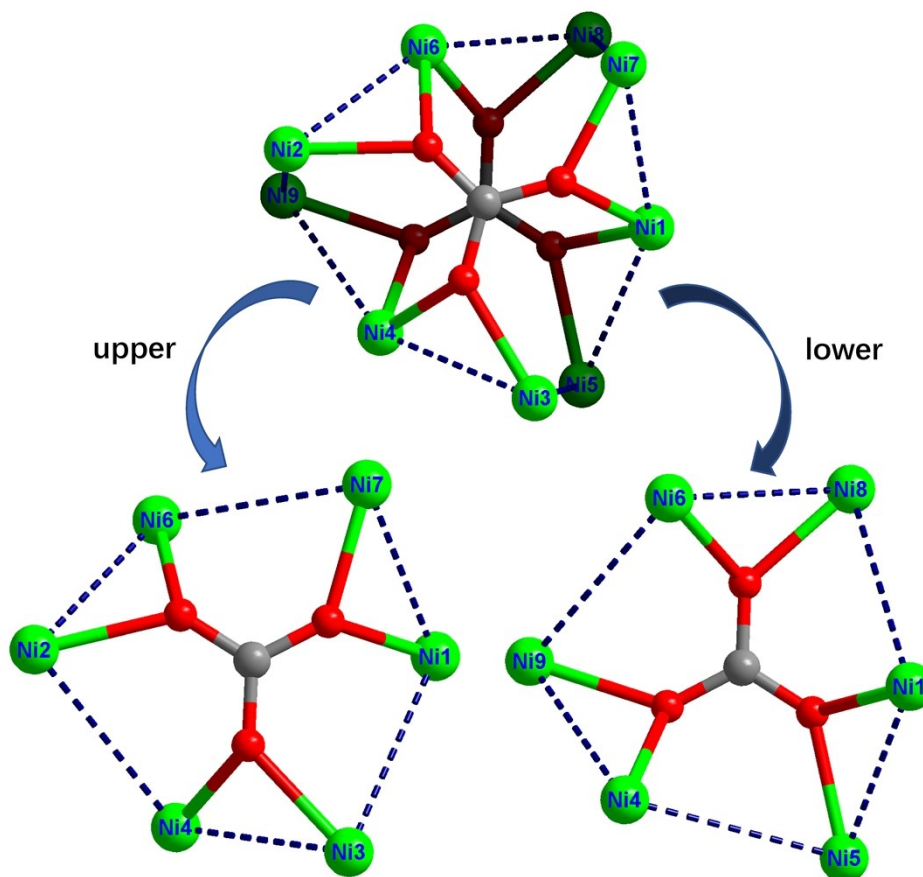

**Table S3** The intramolecular hydrogen bond lengths [ $\text{\AA}$ ] and angles [ $^\circ$ ] in **SD/Ni9a** (D and A represent donor and acceptor, respectively).

| D-H $\cdots$ A      | D-H  | H $\cdots$ A | D $\cdots$ A | D-H $\cdots$ A |
|---------------------|------|--------------|--------------|----------------|
| N3-H3 $\cdots$ O1   | 0.86 | 2.13         | 2.944(4)     | 158.2          |
| N6-H6 $\cdots$ O4   | 0.86 | 2.06         | 2.885(4)     | 161.1          |
| N9-H9 $\cdots$ O5   | 0.86 | 2.07         | 2.910(3)     | 164.8          |
| N10-H10 $\cdots$ O7 | 0.86 | 2.12         | 2.942(4)     | 160.4          |
| N11-H11 $\cdots$ O2 | 0.86 | 2.12         | 2.929(3)     | 156.0          |
| N12-H12 $\cdots$ O9 | 0.86 | 2.09         | 2.906(5)     | 159.2          |

**Table S4** Identification of the key species in ESI-MS of **SD/Ni9a**.

| Species          | Molecular formula                                                                                          | Exp. <i>m/z</i> | Sim. <i>m/z</i> |
|------------------|------------------------------------------------------------------------------------------------------------|-----------------|-----------------|
| <b><i>Ia</i></b> | $[\text{Ni}_9(\text{OH})_8(\text{ba})_9(\text{Hdmpz})_2]^+$                                                | 1944.865        | 1944.828        |
| <b><i>Ib</i></b> | $[\text{Ni}_9(\text{OH})_7(\text{CO}_3)(\text{ba})_8(\text{Hdmpz})_3]^+$                                   | 1962.878        | 1962.850        |
| <b><i>Ic</i></b> | $[\text{Ni}_9(\text{OH})_6(\text{CO}_3)_2(\text{ba})_7(\text{Hdmpz})_4]^+$                                 | 1980.889        | 1980.871        |
| <b><i>Id</i></b> | $[\text{Ni}_9(\text{OH})_5(\text{CO}_3)_3(\text{ba})_6(\text{Hdmpz})_5]^+$                                 | 1998.919        | 1998.893        |
| <b><i>Ie</i></b> | $[\text{Ni}_9(\text{OH})_6(\text{CO}_3)_2(\text{ba})_7(\text{Hdmpz})_5]^+$                                 | 2076.979        | 2076.940        |
| <b><i>If</i></b> | $[\text{Ni}_9(\text{OH})_5(\text{CO}_3)_2(\text{ba})_8(\text{Hdmpz})_3(\text{EtOH})_2(\text{MeOH})_2]^+$   | 2144.969        | 2144.965        |
| <b><i>Ig</i></b> | $[\text{Ni}_9(\text{OH})_6(\text{CO}_3)_2(\text{ba})_7(\text{Hdmpz})_6]^+$                                 | 2172.998        | 2173.009        |
| <b><i>Ih</i></b> | $[\text{Ni}_9(\text{OH})_3(\text{CO}_3)(\text{ba})_{12}(\text{Hdmpz})_2]^+$                                | 2282.865        | 2282.887        |
| <b><i>Ii</i></b> | $[\text{Ni}_9(\text{OH})_7(\text{CO}_3)_2(\text{ba})_6(\text{Hdmpz})_8(\text{EtOH})(\text{MeOH})]^+$       | 2339.151        | 2339.189        |
| <b><i>Ij</i></b> | $[\text{Ni}_9(\text{OH})_6(\text{CO}_3)_2(\text{ba})_7(\text{Hdmpz})_7(\text{DMF})(\text{H}_2\text{O})]^+$ | 2360.224        | 2360.142        |
| <b><i>Ik</i></b> | $[\text{Ni}_9(\text{OH})_3(\text{CO}_3)(\text{ba})_{12}(\text{Hdmpz})_3]^+$                                | 2378.945        | 2378.956        |
| <b><i>Il</i></b> | $[\text{Ni}_9(\text{OH})_5(\text{CO}_3)_2(\text{ba})_8(\text{Hdmpz})_6(\text{EtOH})(\text{DMF})]^+$        | 2396.157        | 2396.131        |
| <b><i>Im</i></b> | $[\text{Ni}_9(\text{OH})_3(\text{CO}_3)(\text{ba})_{12}(\text{Hdmpz})_4]^+$                                | 2475.005        | 2475.025        |

**Figure S5** The crystal packing structure of **SD/Ni9a**. Ni: green, O: red, N: blue, C: grey. All the solvent molecules and H atoms are omitted for clarity.

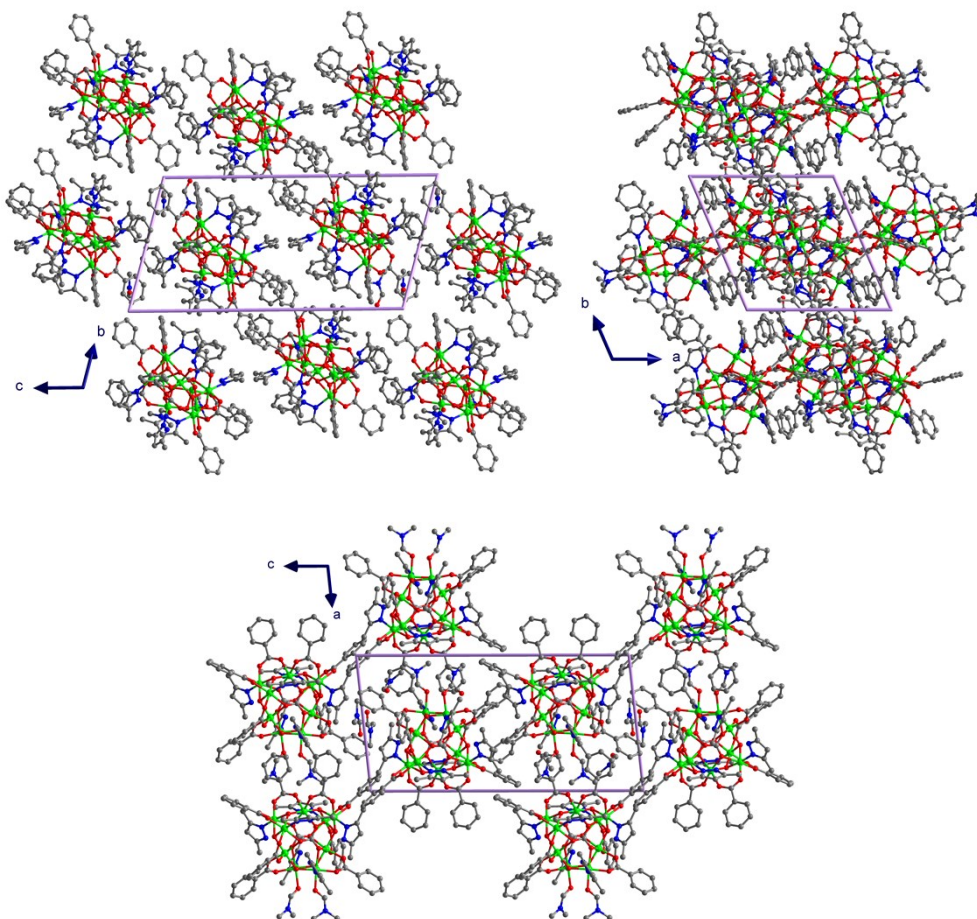

## References

- [1] Rigaku Oxford Diffraction. *CrysAlis<sup>Pro</sup> Software system, version 1.171.40.25a*, Rigaku Corporation: Oxford, UK, **2018**.
- [2] Palatinus, L.; Chapuis, G. *J. Appl. Crystallogr.* **2007**, 40, 786-790.
- [3] Sheldrick, G. M. *Acta Crystallogr., C: Struct. Chem.* **2015**, 71, 3-8.
- [4] Dolomanov, O. V.; Bourhis, L. J.; Gildea, R. J.; Howard, J. A. K.; Puschmann, H. *J. Appl. Crystallogr.* **2009**, 42, 339.
- [5] Spek, A. L. *Acta. Crystallogr. Sect. D.* **2009**, 65, 148-155.
